# Supplementary material
Source: MDPI journal article supplement (https://www.mdpi.com/2077-0472/12/7/913)
Supplement: s1 [file s1]

## Questions for farmers:

|                                                         |                                                                                                    |
|---------------------------------------------------------|----------------------------------------------------------------------------------------------------|
| 1. Farmer ID                                            |                                                                                                    |
| 2. Years of schooling?                                  |                                                                                                    |
| 3. What is your level of education?                     | a) No formal education    b) Literate    c) Primary    d) Secondary    e) College    f) University |
| 4. What is your farming experience?                     |                                                                                                    |
| 5. Are you the owner of land or farmer for the land?    | a) Tenant    b) owner    c) Both                                                                   |
| 6. What is your farm size?                              |                                                                                                    |
| 7. Where is the location of your farm along Mungi canal | a) Head    b) Middle    c) Tail                                                                    |

|                                                                                                        |                                                                                                                                                                                    |
|--------------------------------------------------------------------------------------------------------|------------------------------------------------------------------------------------------------------------------------------------------------------------------------------------|
| 8. What difficulties do you face in warabandi turn?                                                    | a) Less water, does not fulfil my crop demand<br>b) It is fixed and not flexible, does not compatible with demand period<br>c) Creates discussion among neighbours<br>d) Any other |
| 9. What do you do with your warabandi water when you do not need it in your turn?                      | a) Exchange with neighbour<br>b) Sell it to another farmer<br>c) I have big farm I use it all<br>d) I store it<br>e) Any other                                                     |
| 10. Is there an issue for discussion between you and neighbours on warabandi canal water distribution? | A) Yes    B) NO                                                                                                                                                                    |

## 11. How would you rate the changes in your area since last decade?

|                                                                 | Improved/Increased | Not changed | Worse/decreased | Don't know | Remarks |
|-----------------------------------------------------------------|--------------------|-------------|-----------------|------------|---------|
| Amount of canal water                                           |                    |             |                 |            |         |
| Groundwater table                                               |                    |             |                 |            |         |
| Quality of ground water                                         |                    |             |                 |            |         |
| Land/soil salinity                                              |                    |             |                 |            |         |
| Issue for discussion for water distribution in warabandi system |                    |             |                 |            |         |

|                                                                                        |                                                                                                                                                                           |
|----------------------------------------------------------------------------------------|---------------------------------------------------------------------------------------------------------------------------------------------------------------------------|
| 12. How do you decide when to irrigate your field?                                     | a) By observing soil dryness<br>b) Taking soil in hand<br>c) Observing plants<br>d) Every 7 days<br>e) Observing High temperature<br>f) Soil moisture sensor<br>Any other |
| 13. After how many days do you decide to irrigate (interval of irrigation for cotton)? | a) After 7 days<br>b) Depends on weather<br>c) Depends on soil condition<br>d) Other                                                                                      |
| 14. How do you decide how much water you need to apply (for cotton)?                   | a. We fill the field by water<br>b. Fill the furrow depth by water<br>c. According to seed type<br>d. Any other                                                           |
| 15. Do you want a change in turn of warabandi water distribution from 7 days?          | A) Yes    b) No                                                                                                                                                           |

|                                                                                                                                                                                                                                                                                                                                                                                                                                                                         |                                                                   |      |
|-------------------------------------------------------------------------------------------------------------------------------------------------------------------------------------------------------------------------------------------------------------------------------------------------------------------------------------------------------------------------------------------------------------------------------------------------------------------------|-------------------------------------------------------------------|------|
| 16. Have you heard having a water storage pond at farm (for storing warabandi water when you do not need It and use it when you need)?                                                                                                                                                                                                                                                                                                                                  | A) Yes                      b) No                                 |      |
| 17. What barriers would stop you for having/trying to have a pond for warabandi water storage at your field/farm? (the main purpose is to store water when you do not need and use it when you need)<br><br>Please rate from 1 to 5<br><br>1 the barrier has no effect on implementation of pond,<br><br>2 has mild effect 25%,<br><br>3 moderate effect 50%,<br><br>4 has very important effect 75%<br><br>5 is the barrier utmost important to implement this measure | Barriers                                                          | Rate |
|                                                                                                                                                                                                                                                                                                                                                                                                                                                                         | I do not know much about it (low awareness)                       |      |
|                                                                                                                                                                                                                                                                                                                                                                                                                                                                         | I Exchange turns with neighbours which is easier option than pond |      |
|                                                                                                                                                                                                                                                                                                                                                                                                                                                                         | I depend more on tube well water                                  |      |
|                                                                                                                                                                                                                                                                                                                                                                                                                                                                         | I have lack of information and knowledge how it works             |      |
|                                                                                                                                                                                                                                                                                                                                                                                                                                                                         | I lack financial resource for it                                  |      |
|                                                                                                                                                                                                                                                                                                                                                                                                                                                                         | It will be hard to maintain and operate                           |      |
|                                                                                                                                                                                                                                                                                                                                                                                                                                                                         | I am afraid that it will not work/I am not open to new changes    |      |
|                                                                                                                                                                                                                                                                                                                                                                                                                                                                         | others                                                            |      |
|                                                                                                                                                                                                                                                                                                                                                                                                                                                                         |                                                                   |      |

|  |  |  |
|--|--|--|
|  |  |  |
|--|--|--|

|                                                                                                                                                                                                                                                                                                                                     |                                                                     |      |
|-------------------------------------------------------------------------------------------------------------------------------------------------------------------------------------------------------------------------------------------------------------------------------------------------------------------------------------|---------------------------------------------------------------------|------|
| 18. Have you heard about soil moisture sensors?                                                                                                                                                                                                                                                                                     | A)Yes                      b) No                                    |      |
| 19. Would you be willing to try this farming practice?                                                                                                                                                                                                                                                                              | A)Yes                      b) No                                    |      |
| 20. What barriers would stop you using a soil moisture sensor?<br><br>Please rate from 1 to 5<br><br>1 the barrier has no effect on implementation of sensor,<br><br>2 has mild effect 25%,<br><br>3 moderate effect 50%,<br><br>4 has very important effect 75%<br><br>5 is the barrier utmost important to implement this measure | Barriers                                                            | Rate |
|                                                                                                                                                                                                                                                                                                                                     | I do not know much about it (low awareness)                         |      |
|                                                                                                                                                                                                                                                                                                                                     | I fear that soil moisture sensor does not work/ not open to changes |      |
|                                                                                                                                                                                                                                                                                                                                     | I have lack of information and knowledge how it works               |      |
|                                                                                                                                                                                                                                                                                                                                     | I have lack of financial resource for it                            |      |
|                                                                                                                                                                                                                                                                                                                                     | It will be hard to maintain and operate it for long time            |      |
|                                                                                                                                                                                                                                                                                                                                     | Others                                                              |      |

|                                                                                                                                                                                                                                                                        |                                  |      |
|------------------------------------------------------------------------------------------------------------------------------------------------------------------------------------------------------------------------------------------------------------------------|----------------------------------|------|
| 21. Can you afford the 40 % of drip price, while government covers 60% of the cost?                                                                                                                                                                                    | A)Yes                      b) No |      |
| 22. Do you consider drip method a good option for cotton in your farm?                                                                                                                                                                                                 | A)Yes                      b) No |      |
| 23. Do you think a combination of <b>drip</b> (to use less water) with a <b>pond</b> (to store warabandi water) and <b>soil moisture sensor</b> (to know when to irrigate) will be useful to make warabandi flexible and you do not need to use ground water anymore)? | A)Yes                      b) No |      |
| 24. Which obstacles would hinder you in getting a combination of drip, soil moisture sensor and pond? So                                                                                                                                                               | Barriers                         | Rate |
|                                                                                                                                                                                                                                                                        | Low awareness                    |      |

|                                                                                                                                                                                                                                                                                                                                                                          |                                               |  |
|--------------------------------------------------------------------------------------------------------------------------------------------------------------------------------------------------------------------------------------------------------------------------------------------------------------------------------------------------------------------------|-----------------------------------------------|--|
| <p>warabandi water is enough for you, there is no need to pump ground water anymore.</p> <p>Please rate from 1 to 5</p> <p>1 the barrier has no effect on implementation of pond, sensor, drip</p> <p>2 has mild effect 25%,</p> <p>3 moderate effect 50%,</p> <p>4 has very important effect 75%</p> <p>5 is the barrier utmost important to implement this measure</p> | Lack of information and training how it works |  |
|                                                                                                                                                                                                                                                                                                                                                                          | Lack of financial resource for it             |  |
|                                                                                                                                                                                                                                                                                                                                                                          | Hard to maintain and operate it               |  |
|                                                                                                                                                                                                                                                                                                                                                                          | Economically not feasible for farmer          |  |
|                                                                                                                                                                                                                                                                                                                                                                          | Fear that it does not work                    |  |
|                                                                                                                                                                                                                                                                                                                                                                          | Others                                        |  |

|                                                                                                                                                                        |                                                                                                                                                                                                                                                    |
|------------------------------------------------------------------------------------------------------------------------------------------------------------------------|----------------------------------------------------------------------------------------------------------------------------------------------------------------------------------------------------------------------------------------------------|
| 25. How would you use the water if you have more water available from warabandi turn?                                                                                  | <p>a) Growing cash crops</p> <p>b) Cultivating fallow land</p> <p>c) Growing high water-intense crops</p> <p>d) Other</p>                                                                                                                          |
| 26. Would you be willing to participate in a joint experimentation in part of your field along with farmer, scientist and farmer organization to improve water saving? | a) Yes                      b) No                                                                                                                                                                                                                  |
| 27. Please rank from 1 to 5 (5 is most important and 1 is least important) which organization is most useful to you in regards to better water usage suggestions?      | <ul style="list-style-type: none"> <li>• Punjab irrigation department</li> <li>• On farm water management department (Agri Department)</li> <li>• Successful farmers</li> <li>• Membership of farmer organization</li> <li>• Any others</li> </ul> |

**Questions for Academicians and Government officials:**

|           |  |  |
|-----------|--|--|
| 1. ID No: |  |  |
|-----------|--|--|

  

|                                                       |                                                                                                                                                                                 |  |
|-------------------------------------------------------|---------------------------------------------------------------------------------------------------------------------------------------------------------------------------------|--|
| 2. What problems do farmers face in warabandi system? | a) less water, does not fulfil the crop demand<br>b) it is rigid not flexible, does not compatible with demand period<br>c) creates discussion among neighbours<br>d) Any other |  |
|-------------------------------------------------------|---------------------------------------------------------------------------------------------------------------------------------------------------------------------------------|--|

  

|                                                                                                                                                                                                                                                                                                                                                                                                                                                     |                                                           |      |
|-----------------------------------------------------------------------------------------------------------------------------------------------------------------------------------------------------------------------------------------------------------------------------------------------------------------------------------------------------------------------------------------------------------------------------------------------------|-----------------------------------------------------------|------|
| 3. What Barriers would stop farmers for having/trying to have a pond for warabandi water storage at his field/farm (store water when they do not need and use it when you need)?<br><br>Please rate from 1 to 5<br><br>1 the barrier has no effect on implementation of pond,<br><br>2 has mild effect 25%,<br><br>3 moderate effect 50%,<br><br>4 has very important effect 75%<br><br>5 is the barrier utmost important to implement this measure | Barriers                                                  | Rate |
|                                                                                                                                                                                                                                                                                                                                                                                                                                                     | Low awareness                                             |      |
|                                                                                                                                                                                                                                                                                                                                                                                                                                                     | Exchange turns with neighbours is easier option than pond |      |
|                                                                                                                                                                                                                                                                                                                                                                                                                                                     | Dependability more on tube well water                     |      |
|                                                                                                                                                                                                                                                                                                                                                                                                                                                     | Lack of information and training how it works             |      |
|                                                                                                                                                                                                                                                                                                                                                                                                                                                     | Lack of financial resource for it                         |      |
|                                                                                                                                                                                                                                                                                                                                                                                                                                                     | Hard to maintain and operate it                           |      |
|                                                                                                                                                                                                                                                                                                                                                                                                                                                     | Fear that it does not work/not open to new changes        |      |
|                                                                                                                                                                                                                                                                                                                                                                                                                                                     | others                                                    |      |

  

|                                                                       |                                   |  |
|-----------------------------------------------------------------------|-----------------------------------|--|
| 4. Would soil moisture sensor help farmers on good irrigation timing? | a) Yes                      b) No |  |
|-----------------------------------------------------------------------|-----------------------------------|--|

  

|                                                                                                                                                                                                       |                                                                   |      |
|-------------------------------------------------------------------------------------------------------------------------------------------------------------------------------------------------------|-------------------------------------------------------------------|------|
| 5. What Barriers would stop farmers for using soil moisture sensor?<br><br>Please rate from 1 to 5<br><br>1 the barrier has no effect on implementation of soil sensor,<br><br>2 has mild effect 25%, | Barriers                                                          | Rate |
|                                                                                                                                                                                                       | Low awareness                                                     |      |
|                                                                                                                                                                                                       | Fear that soil moisture sensor does not work/ not open to changes |      |
|                                                                                                                                                                                                       | Lack of information and training how it works                     |      |

|                                                                                                                                                                                                                                                                                                                                                                                                                                        |                                                    |      |
|----------------------------------------------------------------------------------------------------------------------------------------------------------------------------------------------------------------------------------------------------------------------------------------------------------------------------------------------------------------------------------------------------------------------------------------|----------------------------------------------------|------|
| 3 moderate effect 50%,<br>4 has very important effect 75%<br>5 is the barrier utmost important to implement this measure                                                                                                                                                                                                                                                                                                               | Lack of financial resource for it                  |      |
|                                                                                                                                                                                                                                                                                                                                                                                                                                        | Hard to maintain and operate it for long time      |      |
|                                                                                                                                                                                                                                                                                                                                                                                                                                        | Others                                             |      |
| 6. Do you consider a combination of <b>drip</b> (to use less water) with a <b>pond</b> (to store warabandi water) and <b>soil moisture sensor</b> (to know when to irrigate) will be useful to make warabandi flexible and farmers do not need to use ground water anymore)?                                                                                                                                                           | a) Yes                      b) No                  |      |
| 7. Which barriers would stop farmers in getting a combination of drip, soil moisture sensor and pond? So they do not need to pump ground water anymore<br><br>Please rate from 1 to 5<br><br>1 the barrier has no effect on implementation of pond, drip, sensor<br><br>2 has mild effect 25%,<br><br>3 moderate effect 50%,<br><br>4 has very important effect 75%<br><br>5 is the barrier utmost important to implement this measure | Barriers                                           | Rate |
|                                                                                                                                                                                                                                                                                                                                                                                                                                        | Low awareness                                      |      |
|                                                                                                                                                                                                                                                                                                                                                                                                                                        | Lack of information and training how it works      |      |
|                                                                                                                                                                                                                                                                                                                                                                                                                                        | Lack of financial resource for it                  |      |
|                                                                                                                                                                                                                                                                                                                                                                                                                                        | Hard to maintain and operate it                    |      |
|                                                                                                                                                                                                                                                                                                                                                                                                                                        | Economically not feasible for farmer               |      |
|                                                                                                                                                                                                                                                                                                                                                                                                                                        | Fear that it does not work/not open to new changes |      |
|                                                                                                                                                                                                                                                                                                                                                                                                                                        | Others                                             |      |
|                                                                                                                                                                                                                                                                                                                                                                                                                                        |                                                    |      |
